# Supplementary material for: Changes in Risk Perception of the Health Effects of Radiation and Mental Health Status: The Fukushima Health Management Survey
Source: PubMed Central journal article supplement (PMC6030686; doi:10.3390/ijerph15061219), 2018-06-10
Supplement: ijerph-15-01219-s001.pdf [file ijerph-15-01219-s001.pdf]

Supplementary Table 1. Comparison of basic characteristics of respondents to all 3 surveys and those to 1 or 2 surveys

|                                 | All    |      | Respondents to 3 surveys |      | Respondents to 1 or 2 surveys |      |
|---------------------------------|--------|------|--------------------------|------|-------------------------------|------|
|                                 | n      | %    | n                        | %    | n                             | %    |
| Basic characteristics in FY2011 |        |      |                          |      |                               |      |
| Gender                          |        |      |                          |      |                               |      |
| Men                             | 41,678 | 44.8 | 11,877                   | 42.8 | 29,801                        | 45.7 |
| Women                           | 51,332 | 55.2 | 15,867                   | 57.2 | 35,465                        | 54.3 |
| Age                             |        |      |                          |      |                               |      |
| 15-49                           | 32,729 | 35.7 | 7,269                    | 26.5 | 25,460                        | 39.6 |
| 50-64                           | 27,180 | 29.6 | 8,746                    | 31.9 | 18,434                        | 28.6 |
| ≥65                             | 31,907 | 34.8 | 11,432                   | 41.7 | 20,475                        | 31.8 |
| Education                       |        |      |                          |      |                               |      |
| Junior high school              | 24,300 | 27.3 | 7,389                    | 26.8 | 16,911                        | 27.5 |
| High school                     | 42,923 | 48.2 | 13,563                   | 49.2 | 29,360                        | 47.7 |
| College or higher               | 21,920 | 24.6 | 6,624                    | 24.0 | 15,296                        | 24.8 |
| Risk perception in FY2011       |        |      |                          |      |                               |      |
| Delayed effect                  |        |      |                          |      |                               |      |
| Very unlikely (1)               | 15,536 | 22.8 | 6,006                    | 23.1 | 9,530                         | 22.6 |
| Unlikely (2)                    | 20,167 | 29.6 | 7,917                    | 30.5 | 12,250                        | 29.0 |
| Likely (3)                      | 15,550 | 22.8 | 5,900                    | 22.7 | 9,650                         | 22.9 |
| Very likely (4)                 | 16,912 | 24.8 | 6,160                    | 23.7 | 10,752                        | 25.5 |
| Genetic effect                  |        |      |                          |      |                               |      |
| Very unlikely (1)               | 10,698 | 15.7 | 4,004                    | 15.4 | 6,694                         | 15.9 |
| Unlikely (2)                    | 16,641 | 24.5 | 6,442                    | 24.8 | 10,199                        | 24.2 |
| Likely (3)                      | 17,134 | 25.2 | 6,686                    | 25.8 | 10,448                        | 24.8 |
| Very likely (4)                 | 23,598 | 34.7 | 8,821                    | 34.0 | 14,777                        | 35.1 |

Supplementary Table 2. Distribution of basic characteristics, mental health status, exposure to and secondary stressors of the disaster according to risk perception change pattern for the delayed effect

|                                       | All   |      | Stay high |      | Unstable |      | Later-low |      |
|---------------------------------------|-------|------|-----------|------|----------|------|-----------|------|
|                                       | n     | %    | n         | %    | n        | %    | n         | %    |
| Basic characteristics (FY2011)        |       |      |           |      |          |      |           |      |
| Gender                                |       |      |           |      |          |      |           |      |
| Men                                   | 3,667 | 38.4 | 1,706     | 38.7 | 526      | 38.8 | 1,435     | 37.8 |
| Women                                 | 5,891 | 61.6 | 2,702     | 61.3 | 829      | 61.2 | 2,360     | 62.2 |
| Age                                   |       |      |           |      |          |      |           |      |
| 15–49                                 | 3,062 | 32.4 | 1,480     | 34.0 | 406      | 30.3 | 1,176     | 31.4 |
| 50–64                                 | 3,172 | 33.6 | 1,445     | 33.2 | 447      | 33.4 | 1,280     | 34.2 |
| ≥65                                   | 3,210 | 34.0 | 1,432     | 32.9 | 487      | 36.3 | 1,291     | 34.5 |
| Education                             |       |      |           |      |          |      |           |      |
| Junior high school                    | 1,955 | 20.9 | 927       | 21.6 | 265      | 20.0 | 763       | 20.5 |
| High school                           | 4,865 | 52.1 | 2,219     | 51.8 | 716      | 54.0 | 1,930     | 51.8 |
| College or higher                     | 2,515 | 26.9 | 1,137     | 26.6 | 346      | 26.1 | 1,032     | 27.7 |
| Mental health status                  |       |      |           |      |          |      |           |      |
| Traumatic reaction (FY2011)           |       |      |           |      |          |      |           |      |
| 17–49                                 | 6,890 | 77.4 | 2,899     | 70.7 | 1,018    | 80.2 | 2,973     | 84.0 |
| ≥50                                   | 2,017 | 22.7 | 1,199     | 29.3 | 252      | 19.8 | 566       | 16.0 |
| Traumatic reaction (FY2012)           |       |      |           |      |          |      |           |      |
| 17–49                                 | 7,243 | 83.9 | 3,026     | 76.6 | 1,092    | 88.9 | 3,125     | 90.4 |
| ≥50                                   | 1,394 | 16.1 | 925       | 23.4 | 137      | 11.2 | 332       | 9.6  |
| Traumatic reaction (FY2013)           |       |      |           |      |          |      |           |      |
| 17–49                                 | 7,375 | 84.9 | 3,104     | 77.9 | 1,055    | 86.1 | 3,216     | 92.6 |
| ≥50                                   | 1,310 | 15.1 | 882       | 22.1 | 170      | 13.9 | 258       | 7.4  |
| Exposure to the disaster (FY2011)     |       |      |           |      |          |      |           |      |
| Earthquake                            |       |      |           |      |          |      |           |      |
| No                                    | 332   | 3.5  | 160       | 3.6  | 50       | 3.7  | 122       | 3.2  |
| Yes                                   | 9,226 | 96.5 | 4,248     | 96.4 | 1,305    | 96.3 | 3,673     | 96.8 |
| Tsunami                               |       |      |           |      |          |      |           |      |
| No                                    | 7,289 | 76.3 | 3,315     | 75.2 | 1,048    | 77.3 | 2,926     | 77.1 |
| Yes                                   | 2,269 | 23.7 | 1,093     | 24.8 | 307      | 22.7 | 869       | 22.9 |
| NPP accident                          |       |      |           |      |          |      |           |      |
| No                                    | 3,643 | 38.1 | 1,540     | 34.9 | 530      | 39.1 | 1,573     | 41.5 |
| Yes                                   | 5,915 | 61.9 | 2,868     | 65.1 | 825      | 60.9 | 2,222     | 58.6 |
| Bereavement                           |       |      |           |      |          |      |           |      |
| No                                    | 7,092 | 75.5 | 3,184     | 73.7 | 1,015    | 76.2 | 2,893     | 77.5 |
| Yes                                   | 2,296 | 24.5 | 1,137     | 26.3 | 317      | 23.8 | 842       | 22.5 |
| Secondary stressors (FY2013)          |       |      |           |      |          |      |           |      |
| Living in other prefecture            |       |      |           |      |          |      |           |      |
| No                                    | 7,889 | 82.8 | 3,591     | 81.7 | 1,107    | 81.9 | 3,191     | 84.4 |
| Yes                                   | 1,637 | 17.2 | 805       | 18.3 | 244      | 18.1 | 588       | 15.6 |
| Family separation                     |       |      |           |      |          |      |           |      |
| None                                  | 5,035 | 54.1 | 2,201     | 51.3 | 707      | 53.6 | 2,127     | 57.6 |
| FY2012 or FY2013                      | 1,148 | 12.3 | 567       | 13.2 | 168      | 12.7 | 413       | 11.2 |
| FY2012 & FY2013                       | 3,121 | 33.5 | 1,527     | 35.6 | 444      | 33.7 | 1,150     | 31.2 |
| Number of relocation                  |       |      |           |      |          |      |           |      |
| 0–2                                   | 2,871 | 32.0 | 1,253     | 30.0 | 414      | 32.4 | 1,204     | 34.1 |
| 3–4                                   | 2,875 | 32.0 | 1,294     | 31.0 | 429      | 33.5 | 1,152     | 32.6 |
| ≥5                                    | 3,234 | 36.0 | 1,624     | 38.9 | 436      | 34.1 | 1,174     | 33.3 |
| Living circumstances                  |       |      |           |      |          |      |           |      |
| Well off /relatively well-off /normal | 4,608 | 51.6 | 1,777     | 43.2 | 667      | 52.4 | 2,164     | 61.1 |
| Poor / relatively poor                | 4,319 | 48.4 | 2,336     | 56.8 | 606      | 47.6 | 1,377     | 38.9 |

Supplementary Table 3. Distribution of basic characteristics, mental health status, and exposure to and secondary stressors of the disaster according to risk perception change pattern for the genetic effect

|                                       | All    |       | Stay high |       | Unstable |       | Later-low |       |
|---------------------------------------|--------|-------|-----------|-------|----------|-------|-----------|-------|
|                                       | n      | %     | n         | %     | n        | %     | n         | %     |
| Basic characteristics (FY2011)        |        |       |           |       |          |       |           |       |
| Gender                                |        |       |           |       |          |       |           |       |
| Men                                   | 4,819  | 39.5  | 2,456     | 38.9  | 686      | 41.3  | 1,677     | 39.8  |
| Women                                 | 7,372  | 60.5  | 3,856     | 61.1  | 977      | 58.8  | 2,539     | 60.2  |
| Age                                   |        |       |           |       |          |       |           |       |
| 15-49                                 | 3,647  | 29.9  | 1,920     | 30.4  | 444      | 26.7  | 1,283     | 30.4  |
| 50-64                                 | 4,217  | 34.6  | 2,165     | 34.3  | 603      | 36.3  | 1,449     | 34.4  |
| ≥65                                   | 4,327  | 35.5  | 2,227     | 35.3  | 616      | 37.0  | 1,484     | 35.2  |
| Education                             |        |       |           |       |          |       |           |       |
| Junior high school                    | 2,516  | 21.1  | 1,344     | 21.82 | 343      | 21    | 829       | 20.07 |
| High school                           | 6,323  | 53.03 | 3,269     | 53.08 | 901      | 55.17 | 2,153     | 52.12 |
| College or higher                     | 3,084  | 25.87 | 1,546     | 25.1  | 389      | 23.82 | 1,149     | 27.81 |
| Mental health status                  |        |       |           |       |          |       |           |       |
| Traumatic reaction (FY2011)           |        |       |           |       |          |       |           |       |
| 17-49                                 | 9075   | 79.8  | 4281      | 73.2  | 1351     | 86.4  | 3443      | 86.8  |
| ≥50                                   | 2300   | 20.2  | 1566      | 26.8  | 212      | 13.6  | 522       | 13.2  |
| Traumatic reaction (FY2012)           |        |       |           |       |          |       |           |       |
| 17-49                                 | 9374   | 85.3  | 4474      | 79.1  | 1392     | 91.8  | 3508      | 92.1  |
| ≥50                                   | 1610   | 14.7  | 1184      | 20.9  | 124      | 8.2   | 302       | 7.9   |
| Traumatic reaction (FY2013)           |        |       |           |       |          |       |           |       |
| 17-49                                 | 9,656  | 86.9  | 4,605     | 80.6  | 1,379    | 90.8  | 3,672     | 94.8  |
| ≥50                                   | 1,450  | 13.1  | 1,108     | 19.4  | 139      | 9.2   | 203       | 5.2   |
| Exposure to the disaster (FY2011)     |        |       |           |       |          |       |           |       |
| Earthquake                            |        |       |           |       |          |       |           |       |
| No                                    | 407    | 3.3   | 223       | 3.5   | 59       | 3.6   | 125       | 3.0   |
| Yes                                   | 11784  | 96.7  | 6089      | 96.5  | 1604     | 96.5  | 4091      | 97.0  |
| Tsunami                               |        |       |           |       |          |       |           |       |
| No                                    | 9,327  | 76.5  | 4,745     | 75.2  | 1,303    | 78.4  | 3,279     | 77.8  |
| Yes                                   | 2,864  | 23.5  | 1,567     | 24.8  | 360      | 21.7  | 937       | 22.2  |
| NPP accident                          |        |       |           |       |          |       |           |       |
| No                                    | 4,731  | 38.8  | 2,248     | 35.6  | 694      | 41.7  | 1,789     | 42.4  |
| Yes                                   | 7,460  | 61.2  | 4,064     | 64.4  | 969      | 58.3  | 2,427     | 57.6  |
| Bereavement                           |        |       |           |       |          |       |           |       |
| No                                    | 9,081  | 75.8  | 4,597     | 74.3  | 1,283    | 78.2  | 3,201     | 77.1  |
| Yes                                   | 2,902  | 24.2  | 1,592     | 25.7  | 357      | 21.8  | 953       | 22.9  |
| Secondary stressors (FY2013)          |        |       |           |       |          |       |           |       |
| Living in other prefecture            |        |       |           |       |          |       |           |       |
| No                                    | 10,241 | 84.3  | 5,228     | 83.1  | 1,415    | 85.2  | 3,598     | 85.7  |
| Yes                                   | 1,913  | 15.7  | 1,066     | 16.9  | 245      | 14.8  | 602       | 14.3  |
| Family separation                     |        |       |           |       |          |       |           |       |
| None                                  | 6,589  | 55.5  | 3,169     | 51.5  | 981      | 60.2  | 2,439     | 59.5  |
| FY2012 or FY2013                      | 1,415  | 11.9  | 790       | 12.9  | 181      | 11.1  | 444       | 10.8  |
| FY2012 & FY2013                       | 3,877  | 32.6  | 2,191     | 35.6  | 468      | 28.7  | 1,218     | 29.7  |
| Number of relocation                  |        |       |           |       |          |       |           |       |
| 0-2                                   | 3,840  | 33.7  | 1,843     | 31.0  | 555      | 35.7  | 1,442     | 37.1  |
| 3-4                                   | 3,605  | 31.6  | 1,893     | 31.8  | 494      | 31.8  | 1,218     | 31.3  |
| ≥5                                    | 3,950  | 34.7  | 2,212     | 37.2  | 506      | 32.5  | 1,232     | 31.7  |
| Living circumstances                  |        |       |           |       |          |       |           |       |
| Well off /relatively well-off /normal | 6,187  | 54.3  | 2,773     | 47.0  | 882      | 56.7  | 2,532     | 64.5  |
| Poor / relatively poor                | 5,198  | 45.7  | 3,127     | 53.0  | 675      | 43.4  | 1,396     | 35.5  |
